# Supplementary material
Source: PubMed Central journal article supplement (PMC10843627)

**Appendix.**

**Appendix Table 1. Taxonomy Definitions for Primary Care Providers**

| Grouping                                                   |     | Classification                                                                                                                                                                                                                                                                                                                                                           | Provider Type            |         | Excluding                                                                                                                                                                                                                                                                                                                                                                                                                                                 |
|------------------------------------------------------------|-----|--------------------------------------------------------------------------------------------------------------------------------------------------------------------------------------------------------------------------------------------------------------------------------------------------------------------------------------------------------------------------|--------------------------|---------|-----------------------------------------------------------------------------------------------------------------------------------------------------------------------------------------------------------------------------------------------------------------------------------------------------------------------------------------------------------------------------------------------------------------------------------------------------------|
| Allopathic & Osteopathic Physicians                        | AND | Family Medicine<br>Internal Medicine<br>General Practice<br>Pediatrics<br>Preventive Medicine<br><i>No indicated classification</i>                                                                                                                                                                                                                                      | <i>Any Provider Type</i> |         |                                                                                                                                                                                                                                                                                                                                                                                                                                                           |
| Physician Assistants & Advanced Practice Nursing Providers | AND | Nurse Practitioner<br>Clinical Nurse Specialist<br>Physician Assistant                                                                                                                                                                                                                                                                                                   | <i>Any Provider Type</i> | AND NOT | <b>Provider type of</b><br>MH Nurse Practitioner<br>Psychiatric Nurse Practitioner<br>MH Nurse Practitioner Mental Health<br>Psych Mental Health Nurse Practitioner<br>Behavioral Health Provider<br>Psychiatrist<br>Behavioral Health Specialist<br><b>OR specialization of</b><br>Psych/Mental Health<br>Psych/Mental Health, Adult<br>Psych/Mental Health, Child & Adolescent<br>Psych/Mental Health, Child & Family<br>Psych/Mental Health, Community |
| <i>No Grouping</i>                                         |     | Military Health Care Provider<br>Naturopath<br>Advanced Practice Midwife<br><br>Student in an Organized Health Care Education/Training Program including:<br>Physician Doctor<br>Medical Doctor<br>Doctor of Osteopathy<br>Medical Resident<br>Nurse Practitioner<br>Cert. Reg. Nurse Practitioner<br>Advanced Nurse Practitioner<br>Certified Nurse Practitioner<br>MSN | <i>Any Provider Type</i> |         |                                                                                                                                                                                                                                                                                                                                                                                                                                                           |
|                                                            |     | NP-C<br>Dr. Nurse Practitioner<br>Physician Assistant                                                                                                                                                                                                                                                                                                                    |                          |         |                                                                                                                                                                                                                                                                                                                                                                                                                                                           |
| <i>No Grouping</i>                                         |     | Naturopath                                                                                                                                                                                                                                                                                                                                                               |                          |         |                                                                                                                                                                                                                                                                                                                                                                                                                                                           |
| <i>No Grouping</i>                                         |     | Midwife<br>Lay Advanced Practice Midwife                                                                                                                                                                                                                                                                                                                                 |                          |         |                                                                                                                                                                                                                                                                                                                                                                                                                                                           |

**Appendix Table 2. Codes used to identify Primary Care, Behavioral Health, and COVID-related Care**

|                                               |                                                                                                                                                                                                                                                                                                                                                                                                                                                                                                                                                                                                                                                                                                                                                                                                                                                                                                                                                                                                                 |
|-----------------------------------------------|-----------------------------------------------------------------------------------------------------------------------------------------------------------------------------------------------------------------------------------------------------------------------------------------------------------------------------------------------------------------------------------------------------------------------------------------------------------------------------------------------------------------------------------------------------------------------------------------------------------------------------------------------------------------------------------------------------------------------------------------------------------------------------------------------------------------------------------------------------------------------------------------------------------------------------------------------------------------------------------------------------------------|
| Evaluation and Management (E&M) Billing Codes | 99201 – 99205, 99211 – 99215, 99241 – 99245, 99381 – 99385, 99386, 99387, 99391 – 99397, G0438, G0439, G0468, 99441 – 99443                                                                                                                                                                                                                                                                                                                                                                                                                                                                                                                                                                                                                                                                                                                                                                                                                                                                                     |
| Behavioral Health Billing Codes               | 90785, 90786, 90791, 90792, 90832 – 90834, 90836 – 90840, 90845 – 90847, 90849, 90853, 90863, 90865, 90867 – 90870, 90875, 90876, 90880, 90882, 90885, 90887, 90889, 90899                                                                                                                                                                                                                                                                                                                                                                                                                                                                                                                                                                                                                                                                                                                                                                                                                                      |
| LOINC codes for COVID labs                    | 40976-3, 41458-1, 92236-9, 94309-2, 94311-8, 94312-6, 94500-6, 94531-1, 94533-7, 94534-5, 94558-4, 94565-9, 94661-6, 94759-8                                                                                                                                                                                                                                                                                                                                                                                                                                                                                                                                                                                                                                                                                                                                                                                                                                                                                    |
| COVID vaccines                                | String search immunization name with “COVID” in the name. Includes the following:<br>ASTRAZENECA COVID-19 VACCINE<br>JANSSEN COVID-19 VACCINE<br>MODERNA COVID-19 VACCINE BIVALENT BOOSTER, BLUE CAP, 6+<br>MODERNA COVID-19 VACCINE BIVALENT BOOSTER, DARK PINK CAP, 6M-5Y<br>MODERNA COVID-19 VACCINE, BLUE CAP MAGENTA LABEL, 6M-5Y<br>MODERNA COVID-19 VACCINE, BLUE CAP PURPLE LABEL, 6-11 PRIMARY SERIES<br>MODERNA COVID-19 VACCINE, RED CAP BLUE LABEL, 12+ PRIMARY SERIES<br>NOVAVAX COVID-19 VACCINE, 18+, 12-17 PRIMARY SERIES<br>PFIZER COVID VACCINE, GRAY CAP, 12+<br>PFIZER COVID VACCINE, MAROON CAP, 6M-4Y<br>PFIZER COVID VACCINE, ORANGE CAP, 5-11<br>PFIZER COVID VACCINE, PURPLE CAP, 12+<br>PFIZER-BIONTECH COVID-19 VACCINE BIVALENT BOOSTER, (GRAY CAP) (TRIS-SUCROSE FORMULATION), 12+<br>PFIZER-BIONTECH COVID-19 VACCINE BIVALENT BOOSTER, (ORANGE CAP) (TRIS-SUCROSE FORMULATION), 5-11<br>PFIZER-BIONTECH COVID-19 VACCINE BIVALENT, MAROON CAP, (TRIS-SUCROSE FORMULATION), 6M-4Y |

**Appendix Figure 1. Quarterly encounters for patients who received primary care, behavioral health and COVID tests/vaccines.**

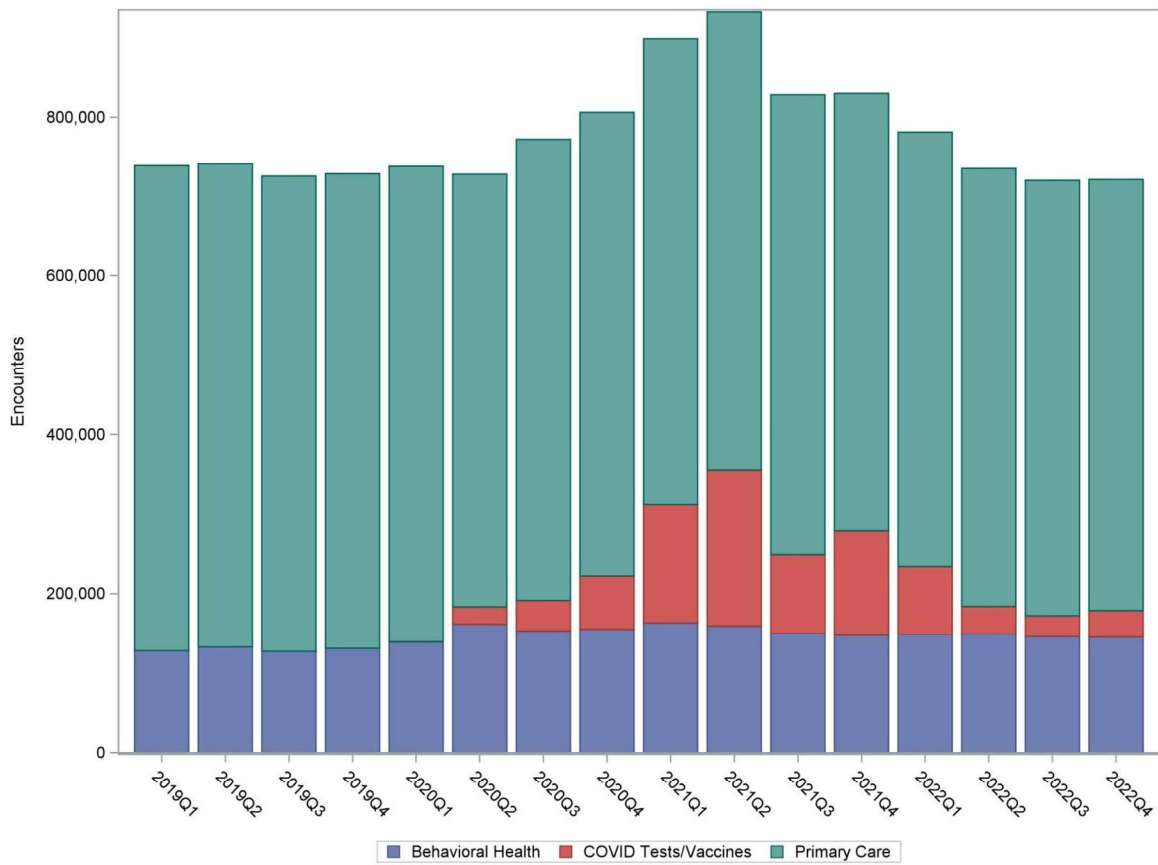

Appendix Figure 2. New and established patients with a visit for primary care and behavioral health by quarter (2019–2022).

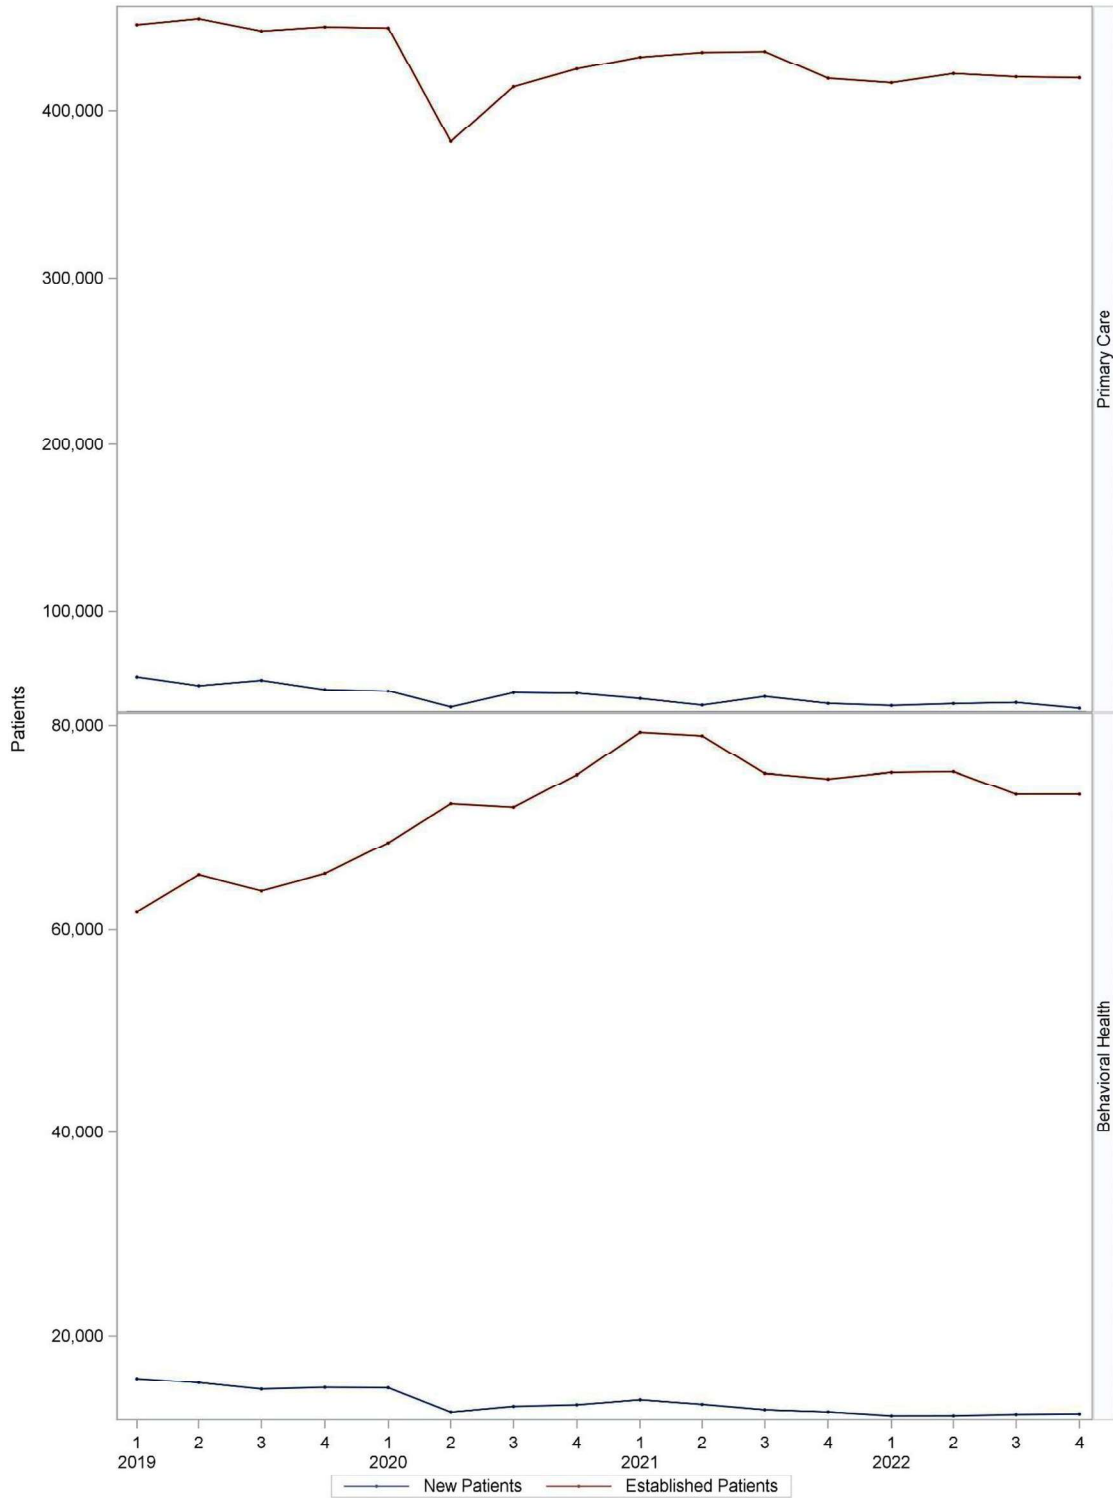

Appendix Figure 3. Patients with a visit for primary care or behavioral health by age group at health centers by quarter (2019–2022).

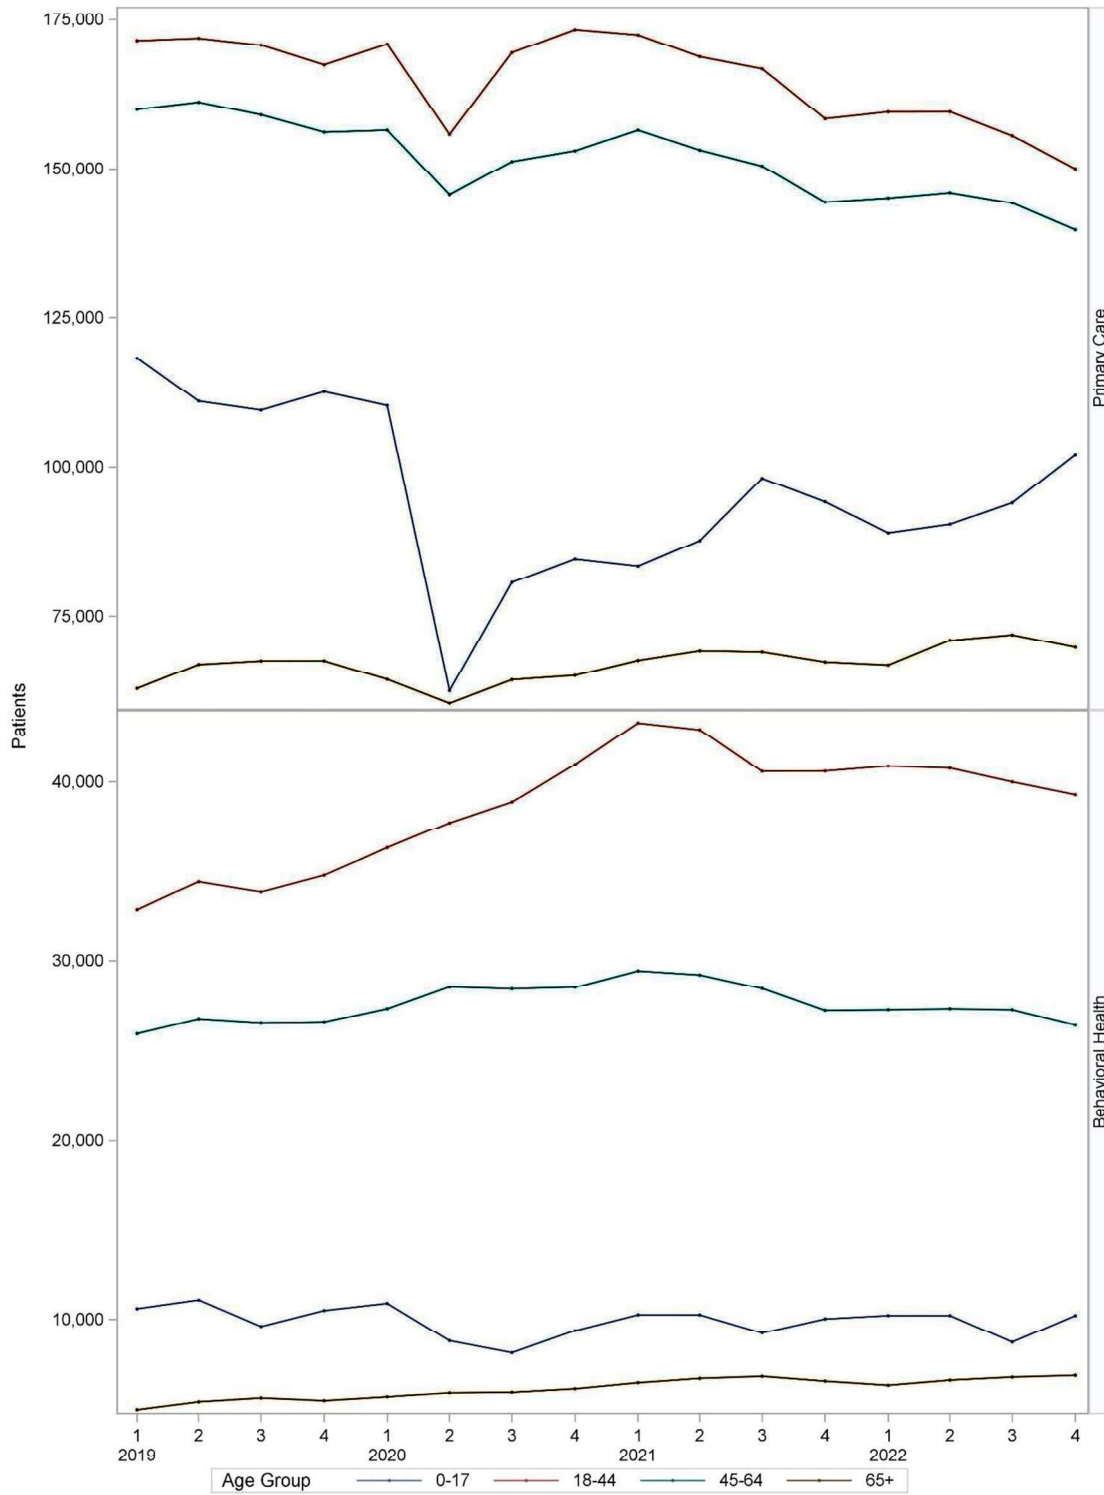

Appendix Figure 4. In-person and telehealth encounters for primary care and behavioral health by quarter (2019–2022).

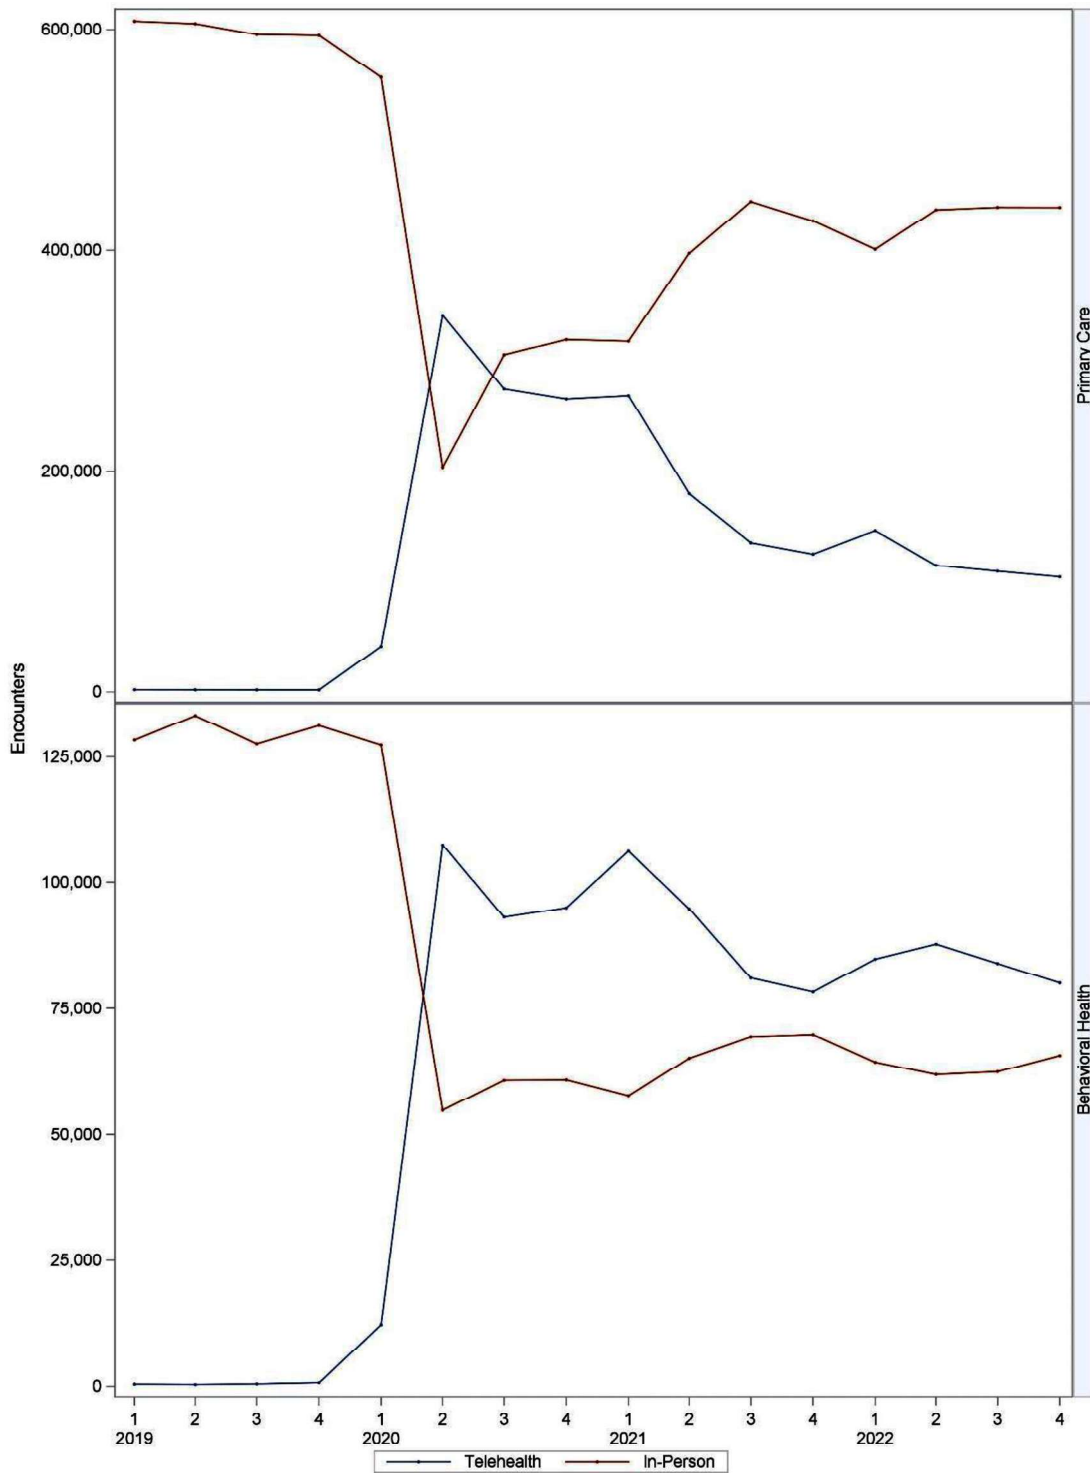

Supplement: NIHMS1946002-supplement-Appendix.pdf [file NIHMS1946002-supplement-Appendix.pdf]
